# Supplementary material for: Magnetic Nanoparticle-Based Electrochemical Sensing Platform Using Ferrocene-Labelled Peptide Nucleic Acid for the Early Diagnosis of Colorectal Cancer
Source: MDPI journal article supplement (doi:10.3390/bios12090736), 2022-09-07
Supplement: s1 [file s1]

## SUPPORTING INFORMATION

# Magnetic Nanoparticle-based Electrochemical Sensing Platform using Ferrocene-labelled Peptide Nucleic Acid for the Early Diagnosis of Colorectal Cancer

Simge Balaban Hanoglu<sup>1</sup>, Ezgi Man <sup>1</sup>, Duygu Harmanci<sup>2</sup>, Serife Tozan Ruzgar<sup>2</sup>, Serdar Sanli<sup>1</sup>, Nazim Arda Keles<sup>3</sup>, Atakan Ayden<sup>3</sup>, Bilge G. Tuna<sup>4</sup>, Ozgul Duzgun<sup>5</sup>, Omer Faruk Ozkan<sup>5</sup>, Soner Dogan<sup>3</sup>, Faezeh Ghorbanizamani<sup>1</sup>, Hichem Moulahoum<sup>1</sup>, Emine Guler Celik<sup>6</sup>, Serap Evran<sup>1,\*</sup> and Suna Timur<sup>1,2,\*</sup>

<sup>1</sup>Department of Biochemistry, Faculty of Science, Ege University, 35100, Bornova, Izmir, Turkey.

<sup>2</sup>Central Research Test and Analysis Laboratory Application and Research Center, Ege University, 35100, Bornova, Izmir, Turkey.

<sup>3</sup>Department of Medical Biology, Yeditepe University, School of Medicine, Istanbul, Turkey.

<sup>4</sup>Department of Biophysics, Yeditepe University, School of Medicine, Istanbul, Turkey.

<sup>5</sup>Umraniye Training and Research Hospital, Surgical Oncology, Istanbul, Turkey.

<sup>6</sup>Department of Bioengineering, Faculty of Engineering, Ege University, 35100, Bornova, Izmir, Turkey.

\*Correspondence: serap.evran@ege.edu.tr; suna.timur@ege.edu.tr

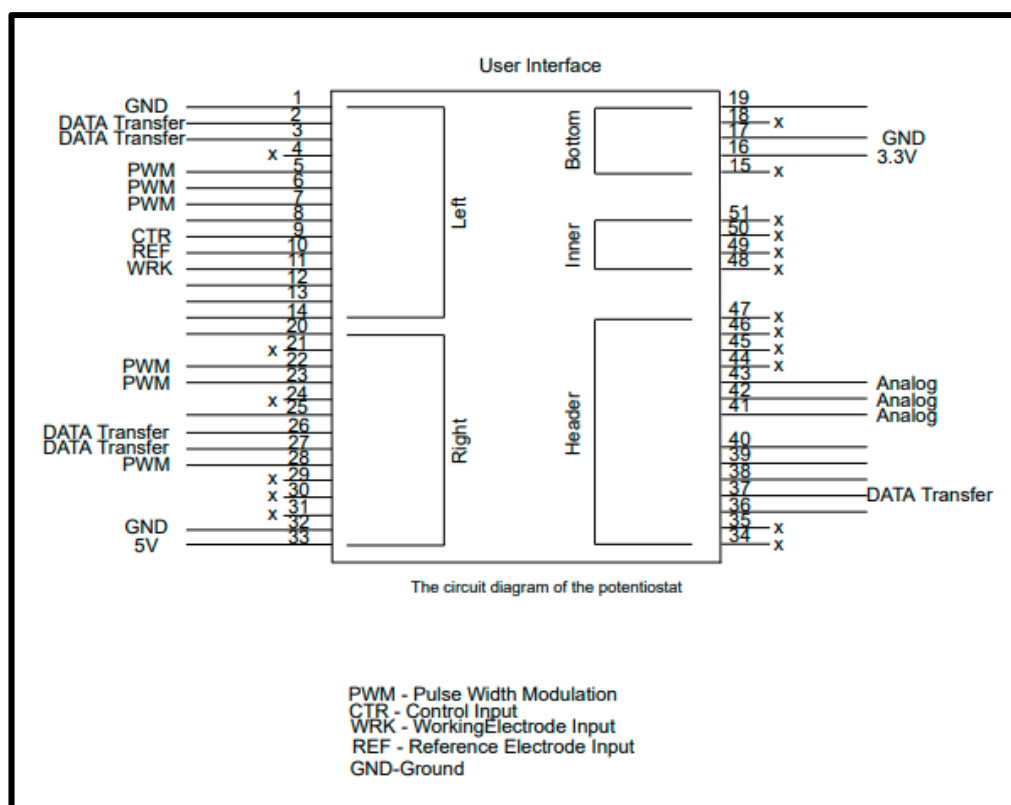

Figure S1. Potentiostat circuit.

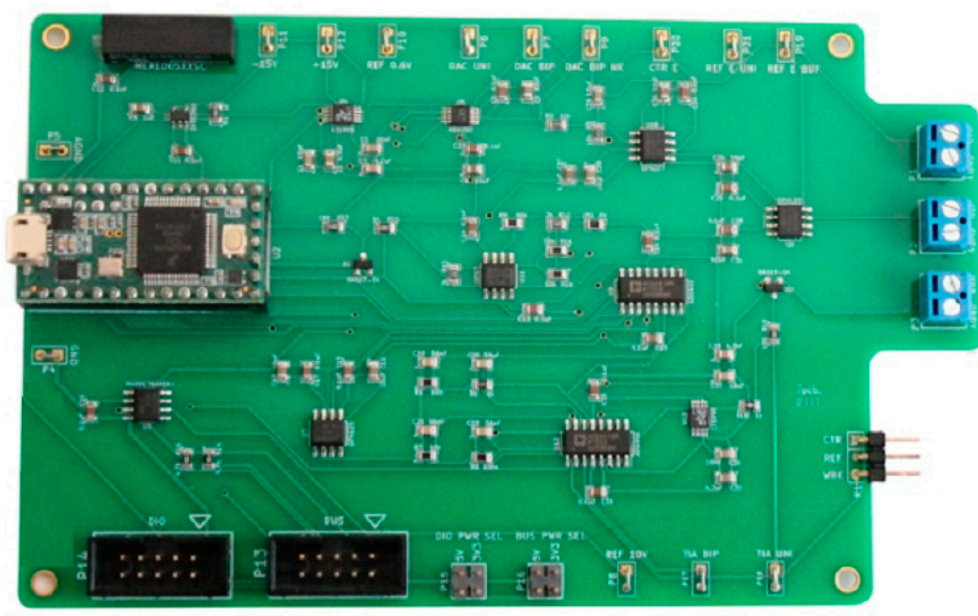

Figure S2. Electrical circuit printing.

**Table S1.** The sequences used in this study. 5-methylcytosine (5-mC) is indicated with mC.

| Name               | Sequence 5' → 3'                                                                                                                                                                                                                                     |
|--------------------|------------------------------------------------------------------------------------------------------------------------------------------------------------------------------------------------------------------------------------------------------|
| SEPT9 amplicon 5   | AGAAACGCACCATGGTTTGGATGCTGAGGGTGAGGGAAAGAGAGGA<br>GTCAACAGTGGTGCCCGGAGACTTGGCTTGAGCAACTAGGTGGATGG<br>TAGCACCGTTTCCTAAGATGAGGGGCTGTGGGAACTTGAGGGGCTGT<br>GAAGGCTCTGCCACTGACGGACCCAGGGCTCGGCAGCTCTGGGAGGC<br>CTACTTTGTGTCAGGCCACGCAGAGATAAGACCATCTGGGC |
| target SEPT9       | TGGGAACTTGAGGGGCTGTGAAGGCTCTGCCACTGACGGACCCAGGG<br>CTCGGCAGCTCTG                                                                                                                                                                                     |
| 100met_SEPT9       | TGGGAACTTGAGGGGmCTGTGAAGGCTmCTGCCAmCTGAmCGGACC<br>mCAGGGCTmCGGmCAGCTmCTG                                                                                                                                                                             |
| 75met_SEPT9        | TGGGAACTTGAGGGGmCTGTGAAGGCTmCTGCCAmCTGAmCGGACC<br>CAGGGCTmCGGCAGCTmCTG                                                                                                                                                                               |
| 50met_SEPT9        | TGGGAACTTGAGGGGCTGTGAAGGCTCTGCCAmCTGAmCGGACCCA<br>GGGCTmCGGCAGCTmCG                                                                                                                                                                                  |
| 25met_SEPT9        | TGGGAACTTGAGGGGCTGTGAAGGCTCTGCCACTGACGGACCCAGGG<br>CTmCGGCAGCTmCTG                                                                                                                                                                                   |
| BCAT1 promoter     | TGCAATCCAGCCmCGCCAmCGTGTACTCGCmCGCCGCCT<br>mCGGGCACTGCCCCAGGTCTTGCTG                                                                                                                                                                                 |
| SOX21-AS1 promoter | GCAGAGmCGCAGCAATGGATATAAATACAAATAmCAGCAGCACmC<br>AGCmCTGTCTTCTTGGCTC                                                                                                                                                                                 |

**Table S2.** ITC measured thermodynamic parameters of the PNA-DNA interaction.

| DNA fragment       | K <sub>d</sub> (nM) | ΔH(kcal/mol) | ΔG(kcal/mol) | ΔS(kcal/mol) |
|--------------------|---------------------|--------------|--------------|--------------|
| unmethylated SEPT9 | 26.5                | -53.2        | -10.3        | -42.9        |
| 100met_SEPT9       | 85.5                | -61.6        | -9.65        | -51.9        |
| 75met_SEPT9        | 20.8                | -51.7        | -10.5        | -41.2        |
| 50met_SEPT9        | 30.4                | -55.3        | -10.3        | -45.1        |
| 25met_SEPT9        | 9.49                | -50.8        | -10.9        | -39.8        |

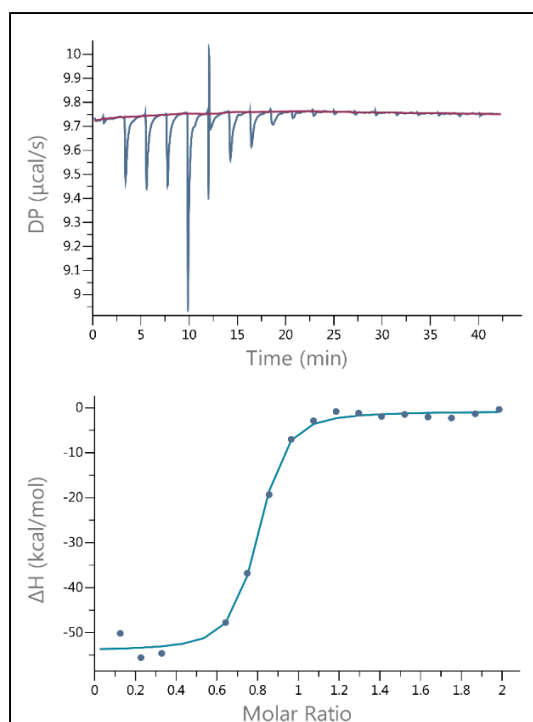

**Figure S3.** Titration data for the hybridization between un methylated SEPT9 fragment and PNA. Raw ITC data (top) and enthalpy change (down).

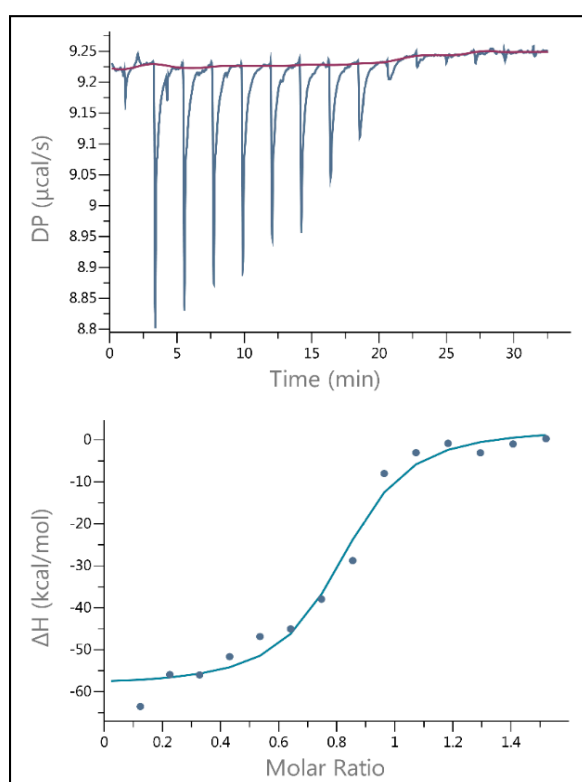

**Figure S4.** Titration data for the hybridization between 100met\_SEPT9 and PNA. Raw ITC data (top) and enthalpy change (down).

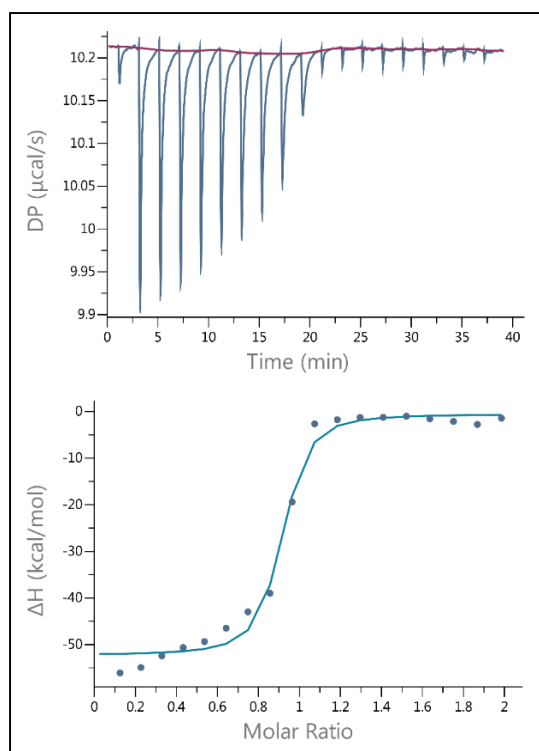

**Figure S5.** Titration data for the hybridization between 75met\_SEPT9 and PNA. Raw ITC data (top) and enthalpy change (down).

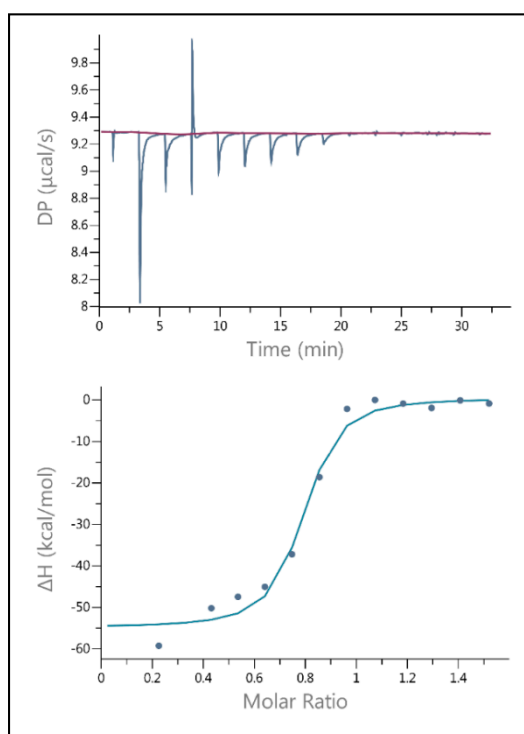

**Figure S6.** Titration data for the hybridization between 50met\_SEPT9 and PNA. Raw ITC data (top) and enthalpy change (down).

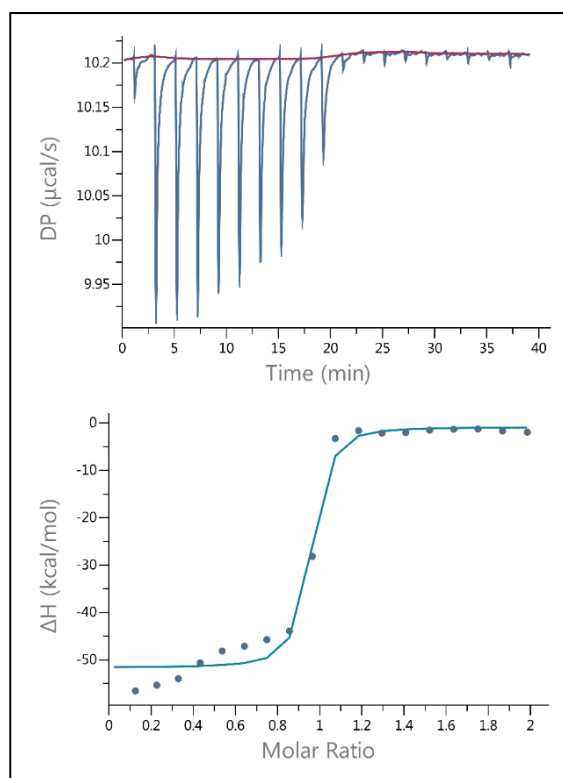

**Figure S7.** Titration data for the hybridization between 25met\_SEPT9 and PNA. Raw ITC data (top) and enthalpy change (down).

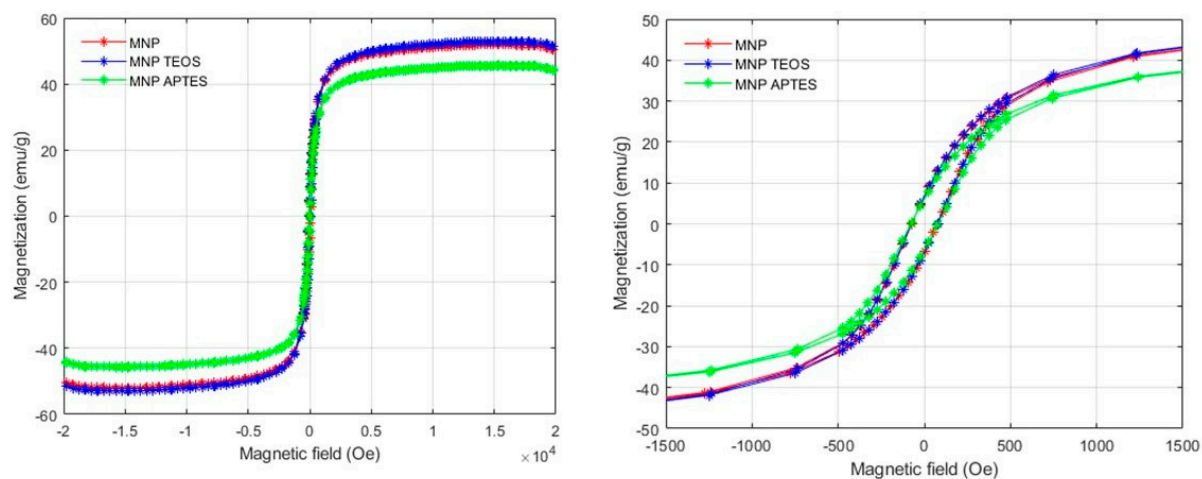

**Figure S8.** VSM results.

**Table S3.** Numerical data of CV and EIS measurements of biosensor.

|                                           | Cationic Current Values<br>( $\mu\text{A}$ ) | Anionic Current<br>Values ( $\mu\text{A}$ ) | Ohm ( $\Omega$ ) |
|-------------------------------------------|----------------------------------------------|---------------------------------------------|------------------|
| Bare SPCE                                 | 29.288                                       | -38.676                                     | 2092             |
| SPCE/MNP                                  | 24.009                                       | -33.126                                     | 6192             |
| SPCE/MNP/EDC:NHS                          | 22.608                                       | -32.811                                     | 5765             |
| SPCE/MNP/EDC:NHS/5-mC Ab                  | 12.318                                       | -22.527                                     | 26560            |
| SPCE/MNP/EDC:NHS/5-mC<br>Ab/mSEPT9/Fc-PNA | 0.310                                        | -0.589                                      | 100000           |

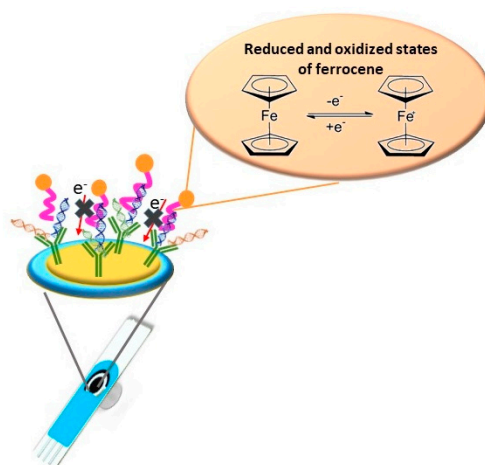

**Scheme S1.** Schematic depiction of the detection principle.

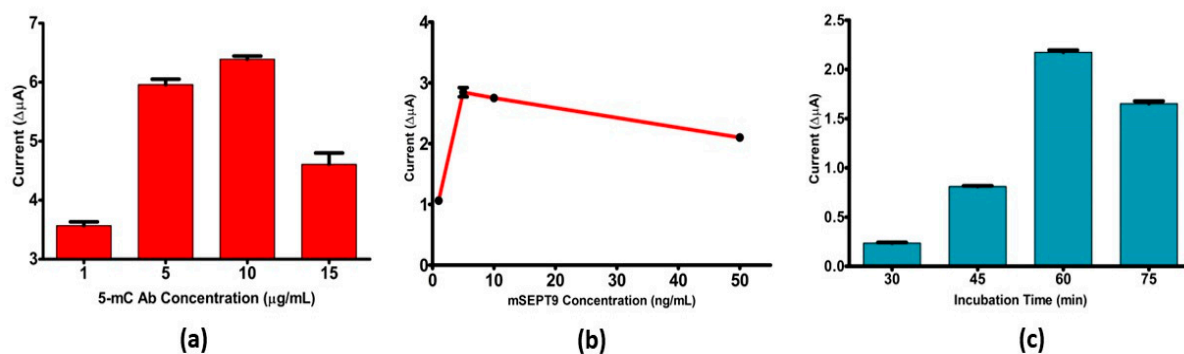

**Figure S9.** Optimization steps of the proposed CRC diagnosis system. (a) 5-mC Ab concentration, (b) mSEPT9 concentration, and (c) mSEPT9/PNA incubation time.

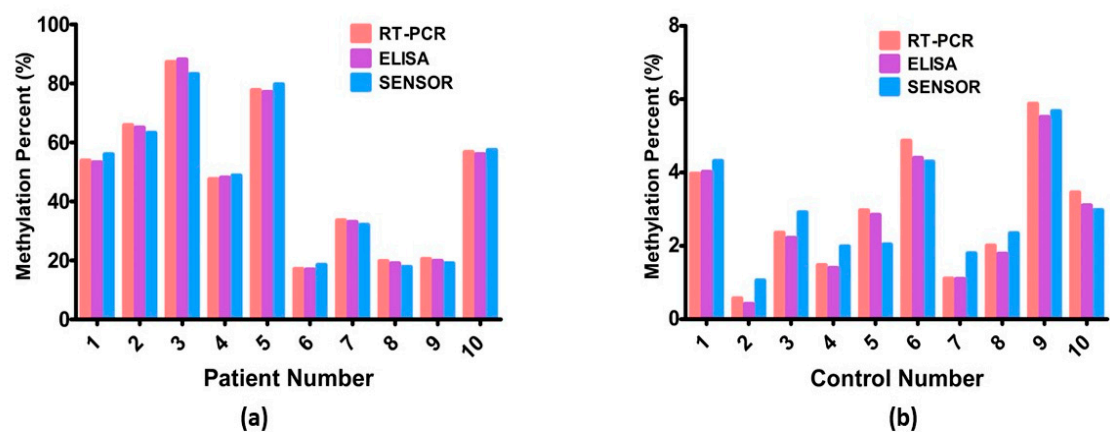

**Figure S10.** Comparative results for sensor, methylated DNA quantification kit (ELISA) and RT-PCR for (a) Patient samples (n=10), (b) Control samples (n=10).

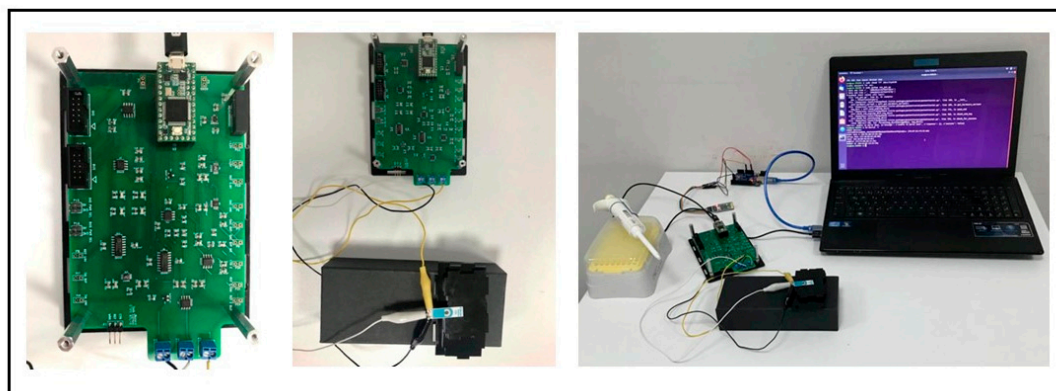

**Figure S11.** Images of the POC.
